# Supplementary material for: Vitamin C Deficiency May Delay Diet-Induced NASH Regression in the Guinea Pig
Source: MDPI journal article supplement (doi:10.3390/antiox11010069), 2021-12-28
Supplement: s1 [file s1]

## Supplementary data

**Table S3:** Liver markers following 16 weeks on diets (pre-intervention)

| Liver                       | LFH                   | HFH                    | HFL                        |
|-----------------------------|-----------------------|------------------------|----------------------------|
| VitC <sup>1</sup><br>nmol/g | 1299.0(1120.0-1572.0) | 1108.0 (1023.0-1316.0) | 153.2 (125.8-165.6)***,### |
| TG<br>μmol/g                | 9.16±4.96             | 54.79±9.08***          | 61.41±9.41***              |
| TC <sup>1</sup><br>μmol/g   | 4.31(3.91-5.06)       | 32.01(30.43-36.28)***  | 32.05(29.42-32.32)***      |

<sup>1</sup>Analysis was performed on log transformed data. Data are presented as medians with Q25-Q75 (in brackets) or means ± SD and analyzed by one-way ANOVA with a Tukey's test for multiple comparisons (n=7-8/group). Difference from LFH: \*\*\*p<0.0001; Difference from HFH: ###p<0.0001. HFH: High Fat High vitC, HFL: High Fat Low vitC, LFH: Low Fat High vitC, TC: Total Cholesterol, TG: Triglycerides, vitC: Vitamin C.
