# Supplementary material for: Vitamin C Deficiency May Delay Diet-Induced NASH Regression in the Guinea Pig
Source: MDPI journal article supplement (doi:10.3390/antiox11010069), 2021-12-28
Supplement: s1 [file s1]

## Supplementary data

**Table S2:** Plasma markers following 16 weeks on diets (pre-intervention).

| Plasma                      | LFH                 | HFH                              | HFL                                  |
|-----------------------------|---------------------|----------------------------------|--------------------------------------|
| VitC <sup>1</sup><br>μmol/L | 38.93(34.44-46.00)  | 34.28 (26.26-41.91)              | 1.98 (1.89-2.03) <sup>****,###</sup> |
| FFA<br>mmol/L               | 0.55±0.07           | 0.61±0.09                        | 0.62±0.26                            |
| TG <sup>1</sup><br>mmol/L   | 0.64(0.57-0.82)     | 0.70(0.50-0.85)                  | 0.68(0.49-1.02)                      |
| TC <sup>1</sup><br>mmol/L   | 0.52(0.49-0.85)     | 7.12(4.98-11.23) <sup>****</sup> | 5.55(4.28-6.94) <sup>****</sup>      |
| ALT <sup>1</sup><br>U/L     | 29.70 (20.20-35.80) | 44.00(33.78-62.90)               | 59.20(38.70-77.60) <sup>*</sup>      |
| AST <sup>1</sup><br>U/L     | 125.6(30.70-328.60) | 398.30(168.95-1002.65)           | 368.30(320.60-532.80)                |
| ALP<br>U/L                  | 56.40±12.73         | 49.88±7.45                       | 61.71±10.05                          |

<sup>1</sup>Analysis was performed on log transformed data. Data are presented as medians with Q25-Q75 (in brackets) or means ± SD and analyzed by one-way ANOVA with a Tukey's test for multiple comparisons (n=7-8/group). Difference from LFH: \*p<0.05, \*\*p<0.01, \*\*\*p<0.001; Difference from HFH: ####p<0.0001. ALP: Alkaline Phosphatase, ALT: Alanine Aminotransferase, AST: Aspartate Aminotransferase, FFA: Free Fatty Acids, HFH: High Fat High vitC, HFL: High Fat Low vitC, LFH: Low Fat High vitC, TC: Total Cholesterol, TG: Triglycerides, vitC: Vitamin C.
