# Supplementary material for: Vitamin C Deficiency May Delay Diet-Induced NASH Regression in the Guinea Pig
Source: Antioxidants (Basel). 2021 Dec 28;11(1):69. doi: 10.3390/antiox11010069 (PMC8772888; doi:10.3390/antiox11010069)
Supplement: Supplementary file 1 [file antioxidants-11-00069-s001.zip]

Archive with 4 entries (4 files):
- Supplementary table S1.pdf
- Supplementary table S2.pdf
- Supplementary table S3.pdf
- Table_S4.xlsx
