# Supplementary material for: Vitamin C Deficiency May Delay Diet-Induced NASH Regression in the Guinea Pig
Source: Antioxidants (Basel). 2021 Dec 28;11(1):69. doi: 10.3390/antiox11010069 (PMC8772888; doi:10.3390/antiox11010069)
Supplement: Supplementary file 1 [file antioxidants-11-00069-s001.zip › Table_S4.xlsx]

## Sheet: supplementary_file_DEG
Gene	Log2 Fold Change	p-value	Adjusted p-value (Benjamini Hochberg & adjusted)
MOCS3	-22.5433	1.93929e-12	1.4376e-08
GPC1	-1.26841	3.76516e-09	1.39556e-05
LRG1	2.1388	1.05121e-08	2.59755e-05
RELL1	0.805346	2.6104e-08	3.25407e-05
PHLDA1	1.44089	2.45291e-08	3.25407e-05
ABCB1	2.17552	2.63381e-08	3.25407e-05
NYNRIN	-0.693746	4.82493e-07	0.00051096
NEDD4L	0.747853	6.24891e-07	0.00057904
HPX	1.28525	2.18045e-06	0.00163633
MMP25	2.05569	2.20738e-06	0.00163633
APCS	1.06921	3.54433e-06	0.00226409
CXCL11	4.78083	3.66505e-06	0.00226409
LONP2	-0.393759	4.4527e-06	0.00253906
FABP5	1.40115	5.03554e-06	0.00266632
S100A8	3.18395	5.70754e-06	0.00282067
HACD4	1.14024	6.27442e-06	0.00290702
GABRR3	4.32891	9.50841e-06	0.00394059
CP	1.28774	9.56842e-06	0.00394059
KIF5A	-1.28376	1.49325e-05	0.00553475
CLEC7A	1.60705	1.45285e-05	0.00553475
FGD1	-0.526868	1.71823e-05	0.00606536
ATP4A	-0.954095	1.98428e-05	0.00668612
ARL11	1.43933	2.1303e-05	0.00686606
MREG	1.14223	2.44703e-05	0.00755826
NID1	0.77861	2.98726e-05	0.00885781
SLC13A5	2.98921	3.23354e-05	0.00891806
KLHL6	1.13897	3.24818e-05	0.00891806
CASP12	1.5958	3.57466e-05	0.00895187
LY75	1.45844	3.62277e-05	0.00895187
LY75.CD302	1.45844	3.62277e-05	0.00895187
SLC16A4	-0.782964	4.41789e-05	0.0105645
LDHA	0.969396	4.78625e-05	0.0110877
GUCY2C	4.00074	5.02558e-05	0.0112893
FBXO5	2.57313	5.42721e-05	0.0118329
ATOH8	-1.06681	7.01024e-05	0.014567
CHAC1	3.8066	7.07425e-05	0.014567
WSCD2	2.79298	7.39398e-05	0.0148139
FDXR	-0.683846	8.45413e-05	0.0164922
COX7A1	-0.507703	0.000106741	0.0197818
KRT23	1.94218	0.00010525	0.0197818
ADAMTS4	1.88885	0.000113775	0.020571
SLAMF7	1.11124	0.000122492	0.0216199
WHRN	-0.927327	0.000139296	0.0240139
ARPC1B	0.697622	0.000152035	0.0251484
MSR1	0.737264	0.000161529	0.0251484
CD1B.5	1.41643	0.000166231	0.0251484
OLFML1	-0.960012	0.000163662	0.0251484
CCR1	0.748125	0.000163649	0.0251484
KLHL25	-0.605896	0.000154921	0.0251484
LGALS3	1.01191	0.000196416	0.0291207
DUSP1	-0.898146	0.000209145	0.0294852
XDH	0.573528	0.000218762	0.0294852
OAF	-0.741929	0.000217458	0.0294852
CRP	1.7825	0.000213306	0.0294852
FUT10	-0.874206	0.000208388	0.0294852
KCNK13	1.37258	0.000227187	0.0300739
CHST11	0.762505	0.000232815	0.0302782
IL13RA1	0.606001	0.000245315	0.0311661
DGCR8	-0.403193	0.000248051	0.0311661
TFCP2L1	-0.63812	0.000253264	0.0312907
MINDY4	-0.638985	0.000259796	0.0315716
LCP2	1.02496	0.000298134	0.0346245
TSKU	-0.750338	0.00029893	0.0346245
INPP5J	2.54618	0.00029318	0.0346245
NSDHL	-1.15252	0.000314352	0.0357395
TRAF5	0.799113	0.000318199	0.0357395
TLR8	1.35598	0.000333749	0.0369265
VPREB3	2.24029	0.000367821	0.040098
CMKLR1	0.64077	0.000381821	0.0408945
FLYWCH1	-0.572393	0.000386162	0.0408945
ICAM2	0.768269	0.000394372	0.0411758
ENPEP	0.859703	0.000410867	0.041189
GLTPD2	1.54711	0.000416724	0.041189
FBLN1	0.617965	0.000412431	0.041189
MRAP2	1.75696	0.000411824	0.041189
NUAK2	0.974685	0.000477318	0.0465573
SPTBN2	-0.469401	0.000507072	0.0487442
TRAF3IP2	0.682223	0.000519593	0.0487442
MS4A1	1.30007	0.000537842	0.0487442
TAPT1	-0.54121	0.00051947	0.0487442
SPATC1L	-0.444908	0.000527935	0.0487442
COL4A2	0.650855	0.000539191	0.0487442
ESM1	1.31908	0.000552826	0.0493747
